# Supplementary material for: Transcriptome sequencing and profiling of expressed genes in cambial zone and differentiating xylem of Japanese cedar (Cryptomeria japonica)
Source: PubMed Central journal article supplement (PMC3999911; doi:10.1186/1471-2164-15-219), 2014-03-20
Supplement: 1471-2164-15-219-S1.pdf [file 1471-2164-15-219-S1.pdf]

## NGS data collection

10 mixed cDNA libraries constructed from one individual

Sequencing

Raw reads  
308,542

Assembly

Singlets\*  
40,435

Isotigs  
14,616

Total unique sequences  
55,051

\* Singlets were not used in microarray analysis because of low confidence

## Microarray analysis

Isotigs  
14,612  
(probes could not be  
designed to 4 isotigs.)

+ ForestGen  
3,470  
(ESTs from woody tissue)

Microarray probes designed

4 × 72K array format  
(18,082 probes were accommodated in at least three replicates)
