# Supplementary material for: Transcriptome sequencing and profiling of expressed genes in cambial zone and differentiating xylem of Japanese cedar (Cryptomeria japonica)
Source: PubMed Central journal article supplement (PMC3999911; doi:10.1186/1471-2164-15-219), 2014-03-20

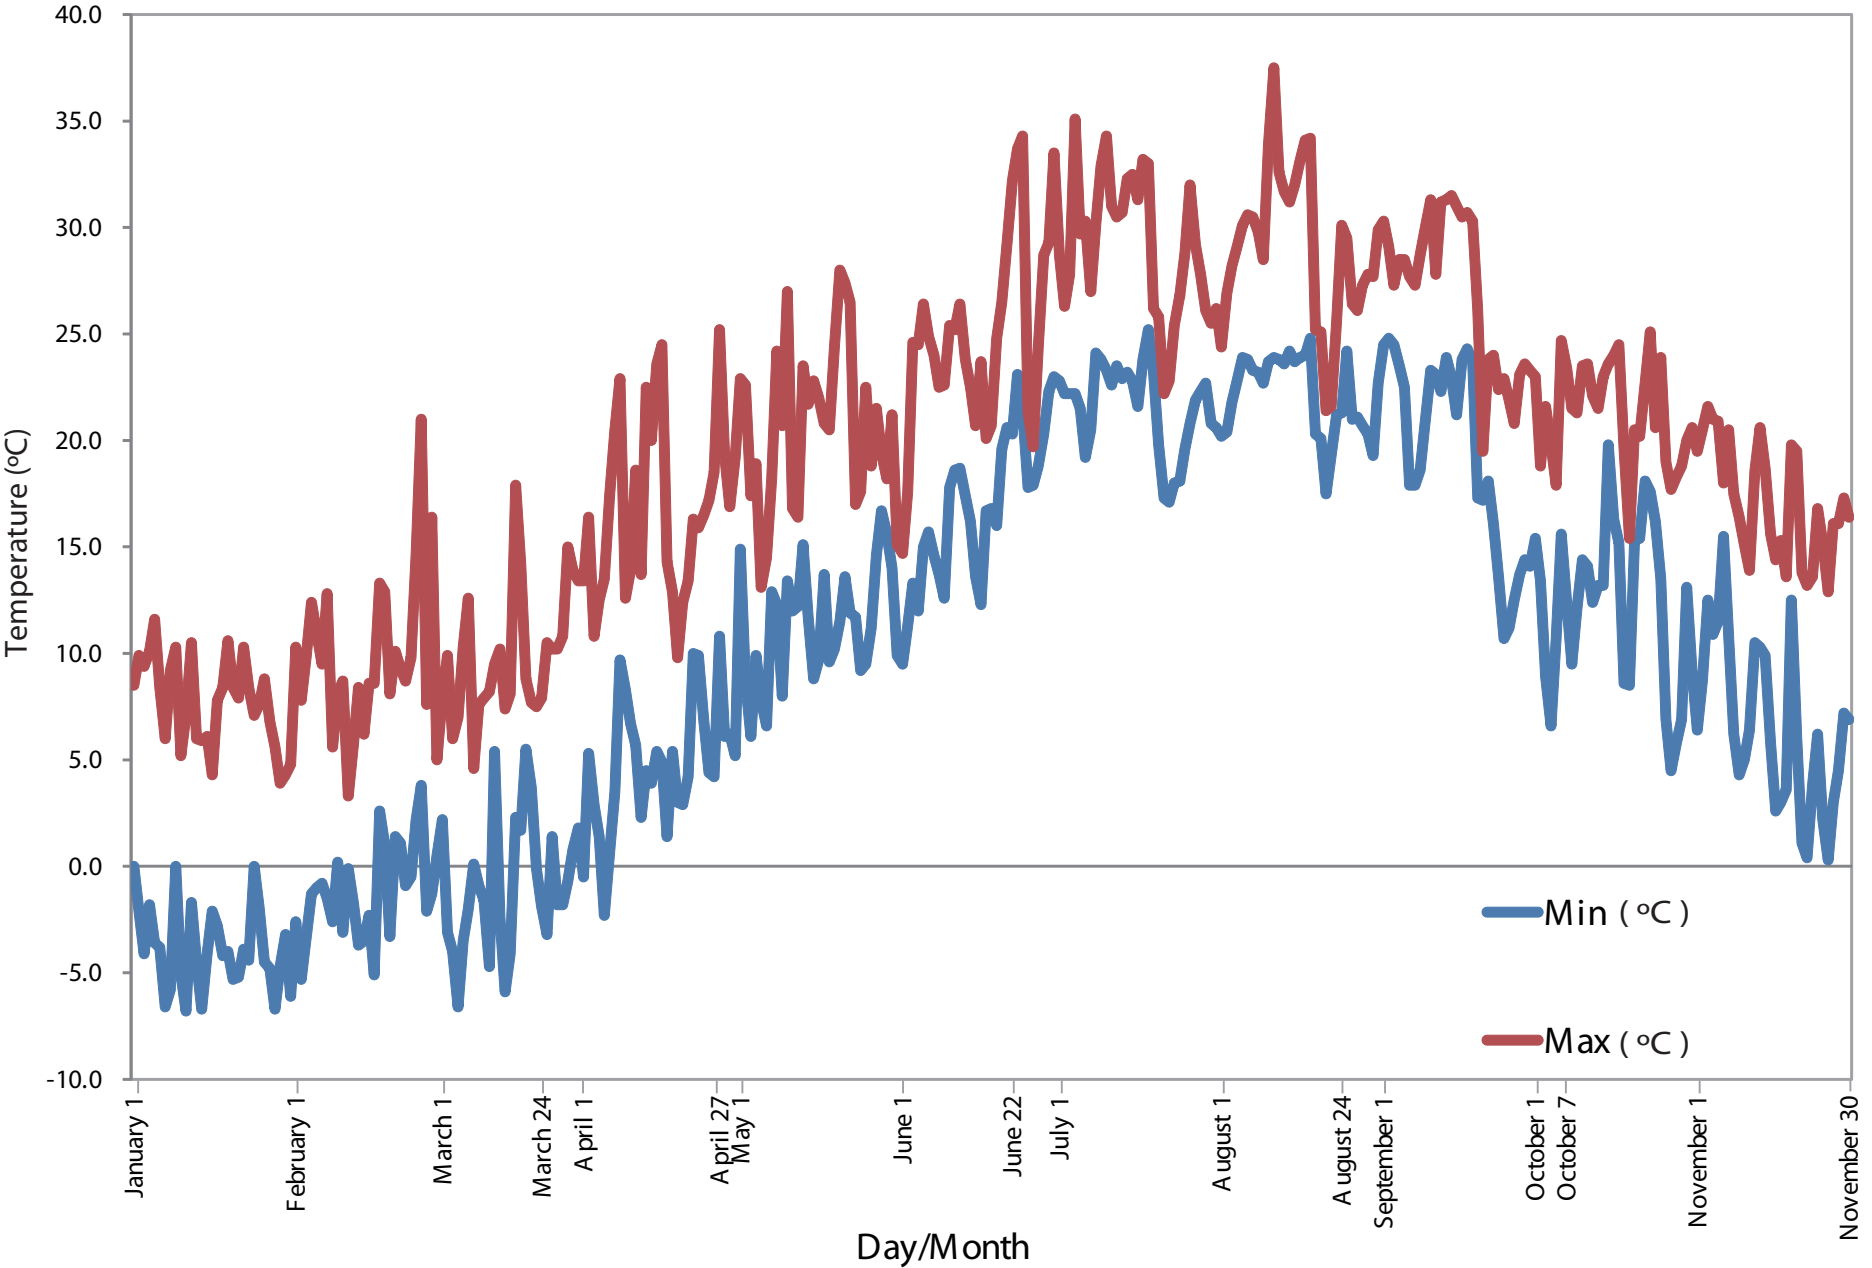

Supplement: 1471-2164-15-219-S4.pdf [file 1471-2164-15-219-S4.pdf]
